# Supplementary material for: The dry reforming of methane over fly ash modified with different content levels of MgO
Source: Royal Society of Chemistry journal article supplement (doi:10.1039/d1ra01381e), 2021-01-01
Supplement: d1ra01381e1.pdf [file d1ra01381e1.pdf]

## Supporting Information

for

### Dry reforming of methane over fly ash modified with different content of MgO

*Yufan Huang<sup>a,b</sup>, Qi Li<sup>a,b</sup>, Teng Zhao<sup>a,b</sup>, Xiaofeng Zhu<sup>a,b</sup>, Zijun Wang<sup>a,b\*</sup>*

<sup>a</sup> School of Chemistry and Chemical Engineering, Shihezi University, Shihezi, Xinjiang 832003, PR China.

<sup>b</sup> Key Laboratory for Green Processing of Chemical Engineering of Xinjiang Bingtuan/Key Laboratory of Materials-Oriented Chemical Engineering of Xinjiang Uygur Autonomous Region/Engineering Research Center of Materials-Oriented Chemical Engineering of Xinjiang Bingtuan, Shihezi, Xinjiang 832003, PR China.

**\*Corresponding Author:** Zijun Wang

**Address:** Beisi Road, Shihezi City, Xinjiang, 832003, P. R. China.

**Tel:** 15699322089

**E-mail Address:** [wzi\\_tea@shzu.edu.cn](mailto:wzi_tea@shzu.edu.cn)

Table S1. NiO(200) XRD diffraction angle and Ni particle size of Ni/FA samples.

| Sample name | NiO particle size by XRD | Reduction catalyst particle size by XRD | Used catalyst Ni particle size by XRD | XRD angle (2 $\theta$ ) (degree) |
|-------------|--------------------------|-----------------------------------------|---------------------------------------|----------------------------------|
| NiO         | -                        | -                                       | -                                     | 43.2                             |
| Ni/FA       | 18nm                     | 30nm                                    | 31nm                                  | 43.3                             |
| Ni/NaFA     | 14nm                     | 28nm                                    | 28nm                                  | 43.3                             |
| Ni/NaFA-    | 11nm                     | 18nm                                    | 23nm                                  | 43.0                             |

|          |      |      |      |      |
|----------|------|------|------|------|
| M1       |      |      |      |      |
| Ni/NaFA- | 16nm | 21nm | 30nm | 43.1 |
| M2       |      |      |      |      |
| Ni/NaFA- | 12nm | 23nm | 27nm | 43.2 |
| M3       |      |      |      |      |

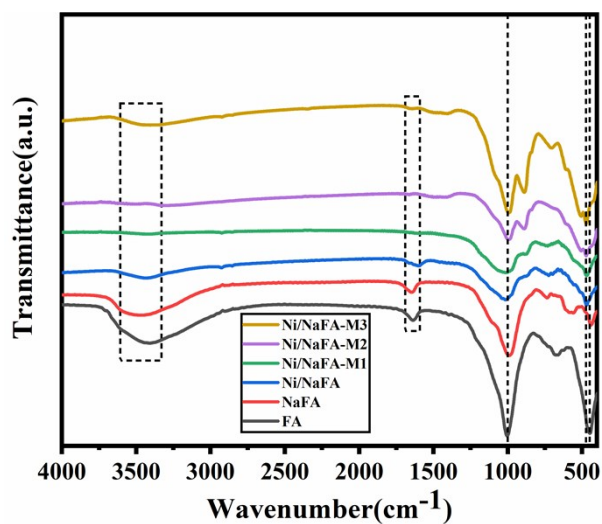

Figure S1. FTIR spectra of catalysts with different MgO content.
